# Supplementary material
Source: PubMed Central journal article supplement (PMC8011891)
Supplement: jci-131-145516-s138.pdf [file jci-131-145516-s138.pdf]

**Supplemental Table 1. Antibodies used**

| <b>Target</b>             | <b>Fluorophore</b> | <b>Clone</b>  | <b>Cat #</b>   | <b>Vendor</b>  |
|---------------------------|--------------------|---------------|----------------|----------------|
| IgM                       | BB515              | G20-127       | 564622         | BD Biosciences |
| IgD                       | BB515              | IA6-2         | 565243         | BD Biosciences |
| CD19                      | APC-R700           | HIB19         | 564977         | BD Biosciences |
| CD3                       | APC-H7             | SK7           | 560176         | BD Biosciences |
| CD138                     | BV711              | MI15          | 563184         | BD Biosciences |
| CD21                      | PE-CF594           | B-LY4         | 563474         | BD Biosciences |
| CD27                      | BV786              | L128          | 563327         | BD Biosciences |
| CD38                      | BB700              | HIT2          | 566445         | BD Biosciences |
| BTLA (CD272)              | BV421              | J168-540      | 564802         | BD Biosciences |
| CD22                      | PE-Cy7             | HIB22         | 563941         | BD Biosciences |
| FCRL5 (CD307e)            | PE                 | 509F6         | 566734         | BD Biosciences |
| CXCR5 (CD185)             | BV480              | RF8B2         | 566142         | BD Biosciences |
| 6x-His Tag mAb            | Alexa Fluor 647    | HIS.H8        | MA1-21315-A647 | ThermoFisher   |
| Fixable Yellow Dead       | BV480              | Viability Dye | L34968         | ThermoFisher   |
| IgG1 Kpa ItCl             | BB700              | X40           | 566404         | BD Biosciences |
| IgG1 Kpa ItCl             | BV711              | X40           | 563044         | BD Biosciences |
| IgG1 Kpa ItCl             | BV421              | X40           | 562438         | BD Biosciences |
| IgG1 Kpa ItCl             | PE-Cy7             | MOPC-21       | 557872         | BD Biosciences |
| IgG2a Kpa ItCl            | PE                 | G155-178      | 554648         | BD Biosciences |
| anti-mouse IgG1 Antibody  | PE                 | RMG1-1        | 406608         | BioLegend      |
| Rat/Ham Ig Kpa Comp Bead  |                    |               | 552845         | BD Biosciences |
| Ms Ig Kpa Comp Bead Set   |                    |               | 552843         | BD Biosciences |
| Hu Fc Block Pure Fc1.3216 |                    |               | 564220         | BD Biosciences |
| ArC Amine Comp            |                    |               | A10346         | ThermoFisher   |

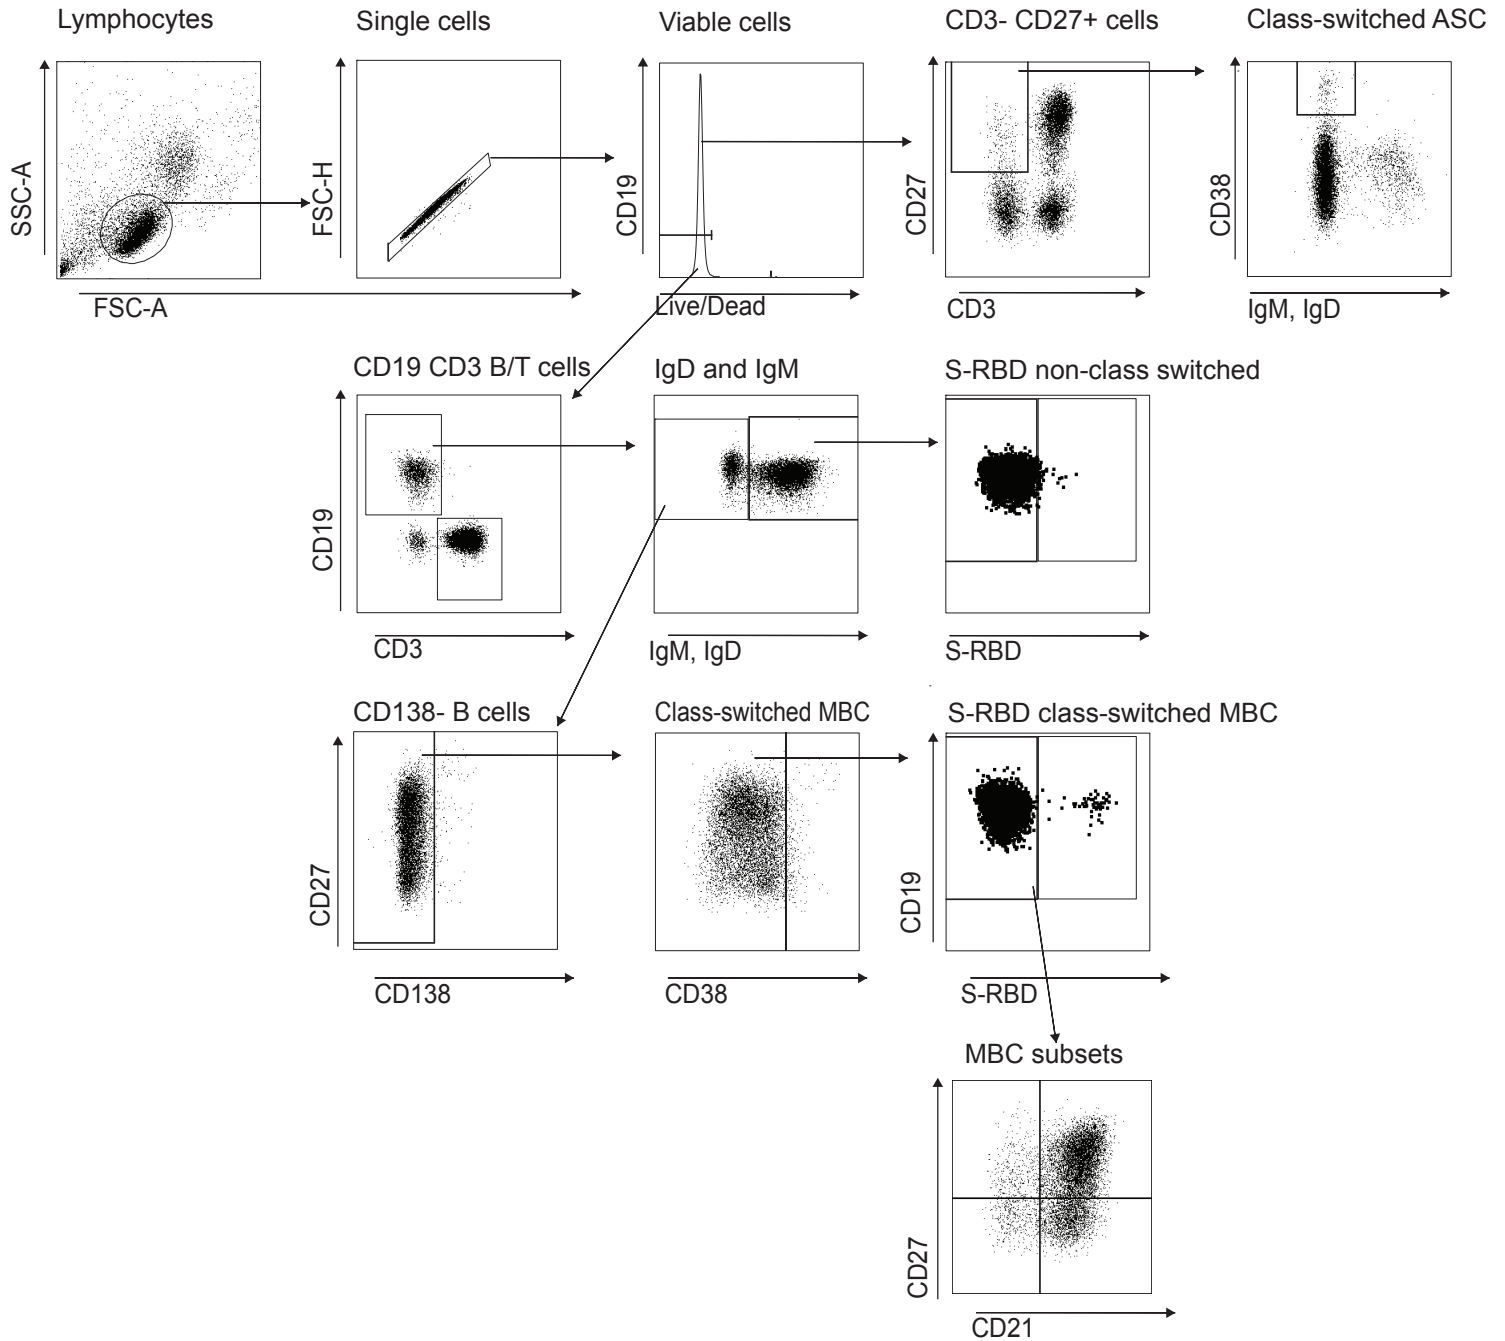

**Supplemental Figure 1.** Gating schematic. All antibodies used are listed in supplemental table 1. Fluorescence minus one (FMO) and isotype controls were used as guide to differentiate positive and negative populations. For S-RBD specific B cells, healthy participants were used as controls to set the gate for positive cells. All cells were run on an LSRII flow cytometer and analyzed using FlowJo

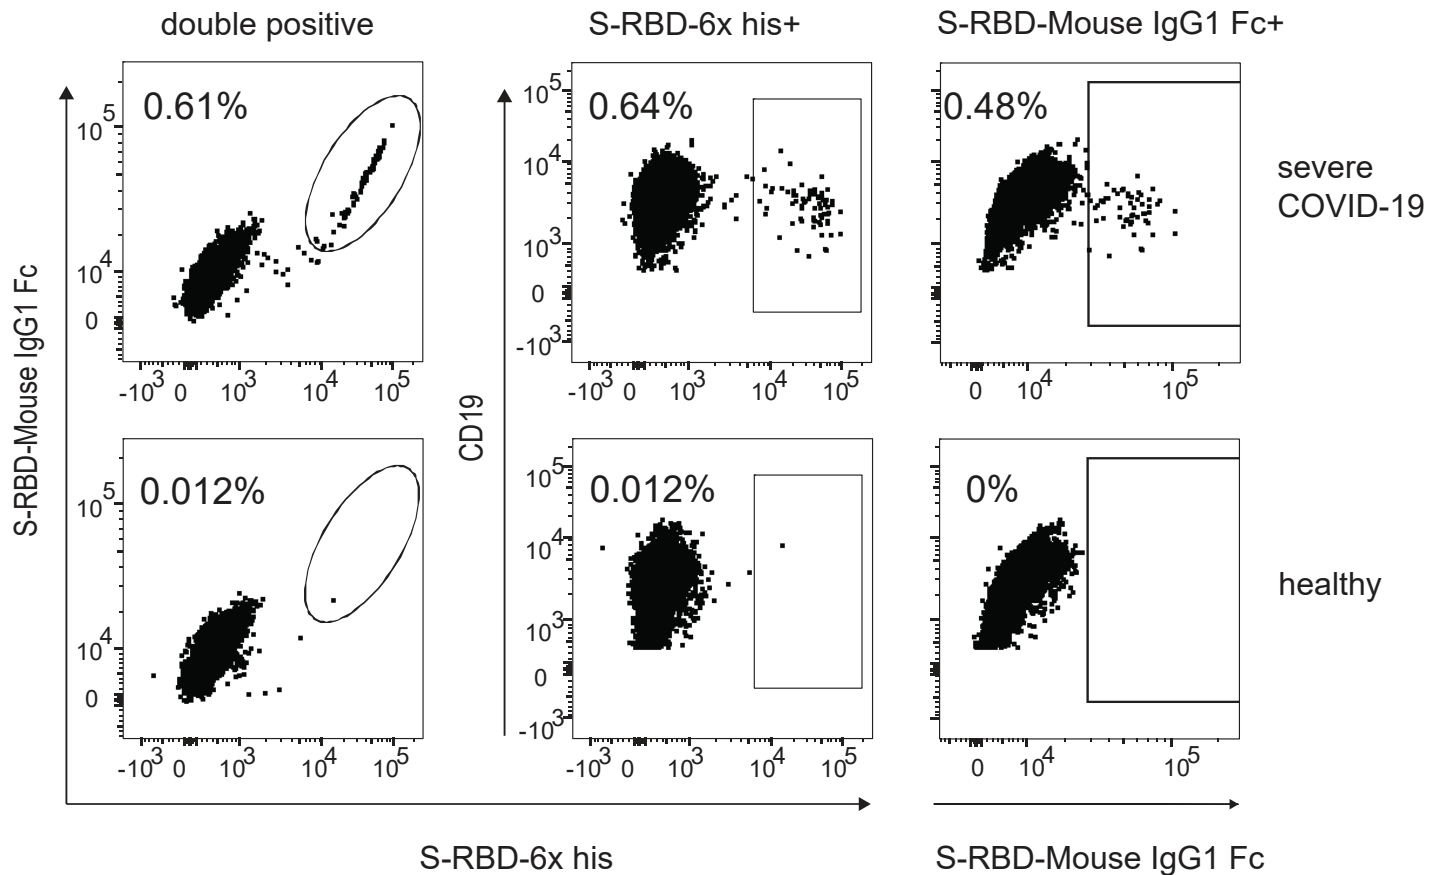

**Supplemental Figure 2.** Confirmation of specificity of S-RBD staining. Class switched MBC (CD3-, CD19+, IgM-, IgD-, CD38+/- (excluding ++), CD138-) from a “healthy” (COVID-19 negative) and a “severe” (COVID-19+, hospitalized) participant were stained with 6XHis-S-RBD-6x and Mouse-Fc-S-RBD simultaneously (first column), or with each S-RBD protein individually (second and third columns). Frequency of S-RBD+ cells was similar using double staining (0.61%) or 6XHis-S-RBD alone (0.64%).

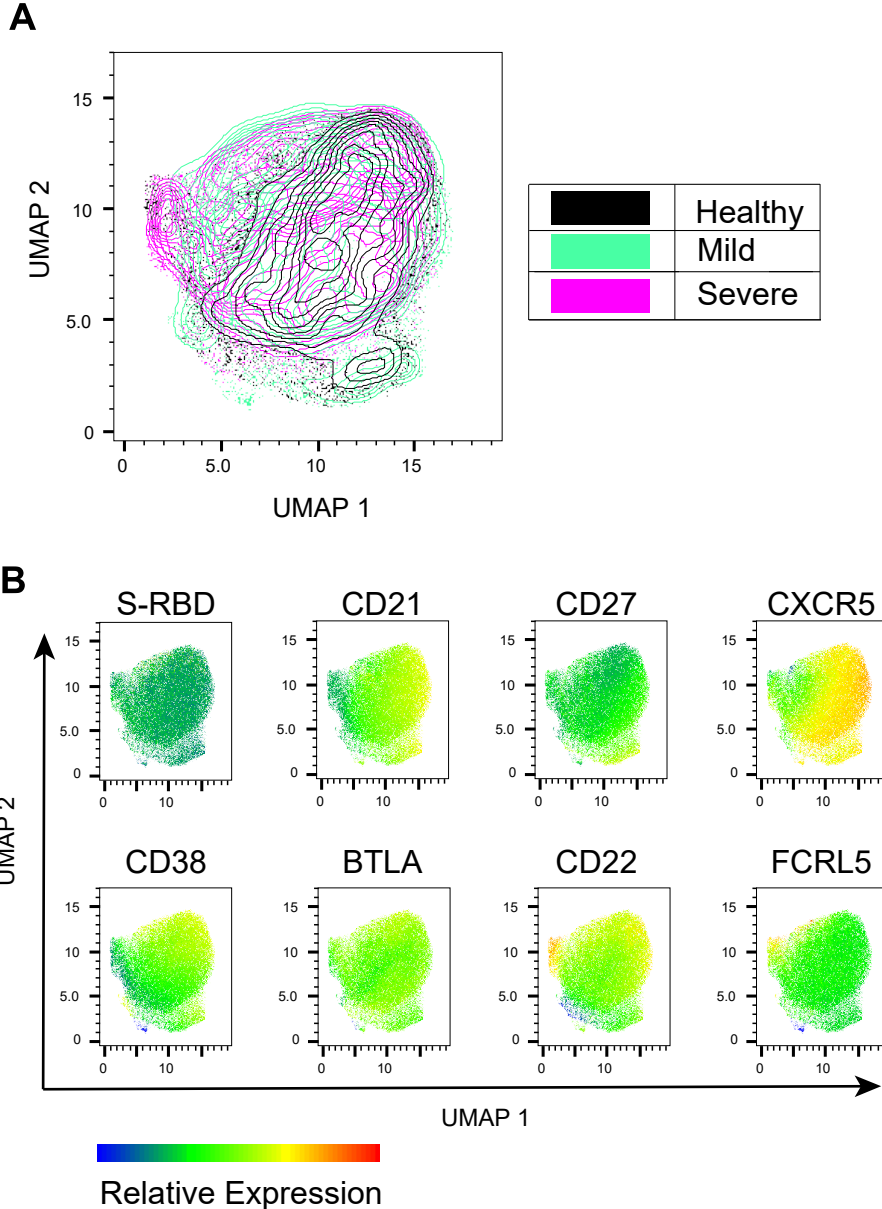

**Supplemental Figure 3. UMAP projection of class switched MBC and heatmap statistic of surface receptors. (A)** Concatenated class switched MBC from healthy, mild, and severe subjects projected as a UMAP of CD21, CD27, CD38, FcRL5, CD22, CXCR5, and BTLA expression. Unlike Figure 3, S-RBD binding was not included as a variable in the generation of this UMAP. All S-RBD+ MBC were included in the analysis, and S-RBD- MBC were downsampled to 3000 cells per participant. **(B)** Cell surface markers multigraph color mapping of the UMAP projection showing S-RBD, CD21, CD27, CD38, FcRL5, CD22, CXCR5, and BTLA expression. Lowest expression is indicated by blue and highest expression by red

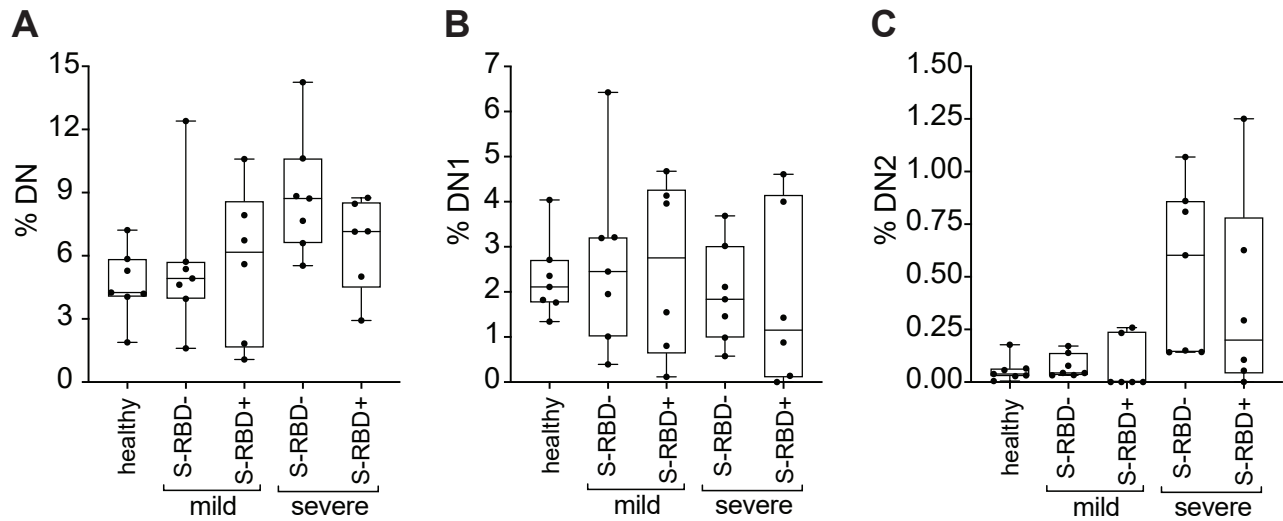

**Supplemental Figure 4. Frequency of class-switched double negative (DN) cells in S-RBD nonspecific (S-RBD-) or S-RBD specific (S-RBD+) B cells from healthy, mild, or severe participants. A)** Class-switched DN B cells are defined as CD3<sup>-</sup>, CD19<sup>+</sup>, IgD<sup>-</sup>, CD27<sup>-</sup>, IgM<sup>-</sup>, CD138<sup>-</sup>, CD38<sup>+/-</sup> (excluding ++). **B)** Class-switched DN1 B cells are defined as CD3<sup>-</sup>, CD19<sup>+</sup>, IgD<sup>-</sup>, CD27<sup>-</sup>, IgM<sup>-</sup>, CD138<sup>-</sup>, CD38<sup>+</sup> (excluding ++), CD21<sup>+</sup>, FCRL5<sup>-</sup>, CXCR5<sup>+</sup>. **C)** Class-switched DN2 B cells are defined as CD3<sup>-</sup>, CD19<sup>+</sup>, IgD<sup>-</sup>, CD27<sup>-</sup>, IgM<sup>-</sup>, CD138<sup>-</sup>, CD38<sup>-</sup>, CD21<sup>-</sup>, FCRL5<sup>+</sup>, CXCR5<sup>-</sup>. Horizontal lines indicate means, boxes are inter-quartile range, and whiskers are minimum to maximum. Normality of data was determined using Shapiro Wilk normality test, and comparisons were performed using one-way ANOVA for normally distributed data (**A**, **B**) or Kruskal-Wallis test for non-normally distributed data (**C**), with p values adjusted for multiple comparisons using the Benjamini, Krieger and Yekutieli method. No statistically significant comparisons were discovered.

# Supplemental Figure 5

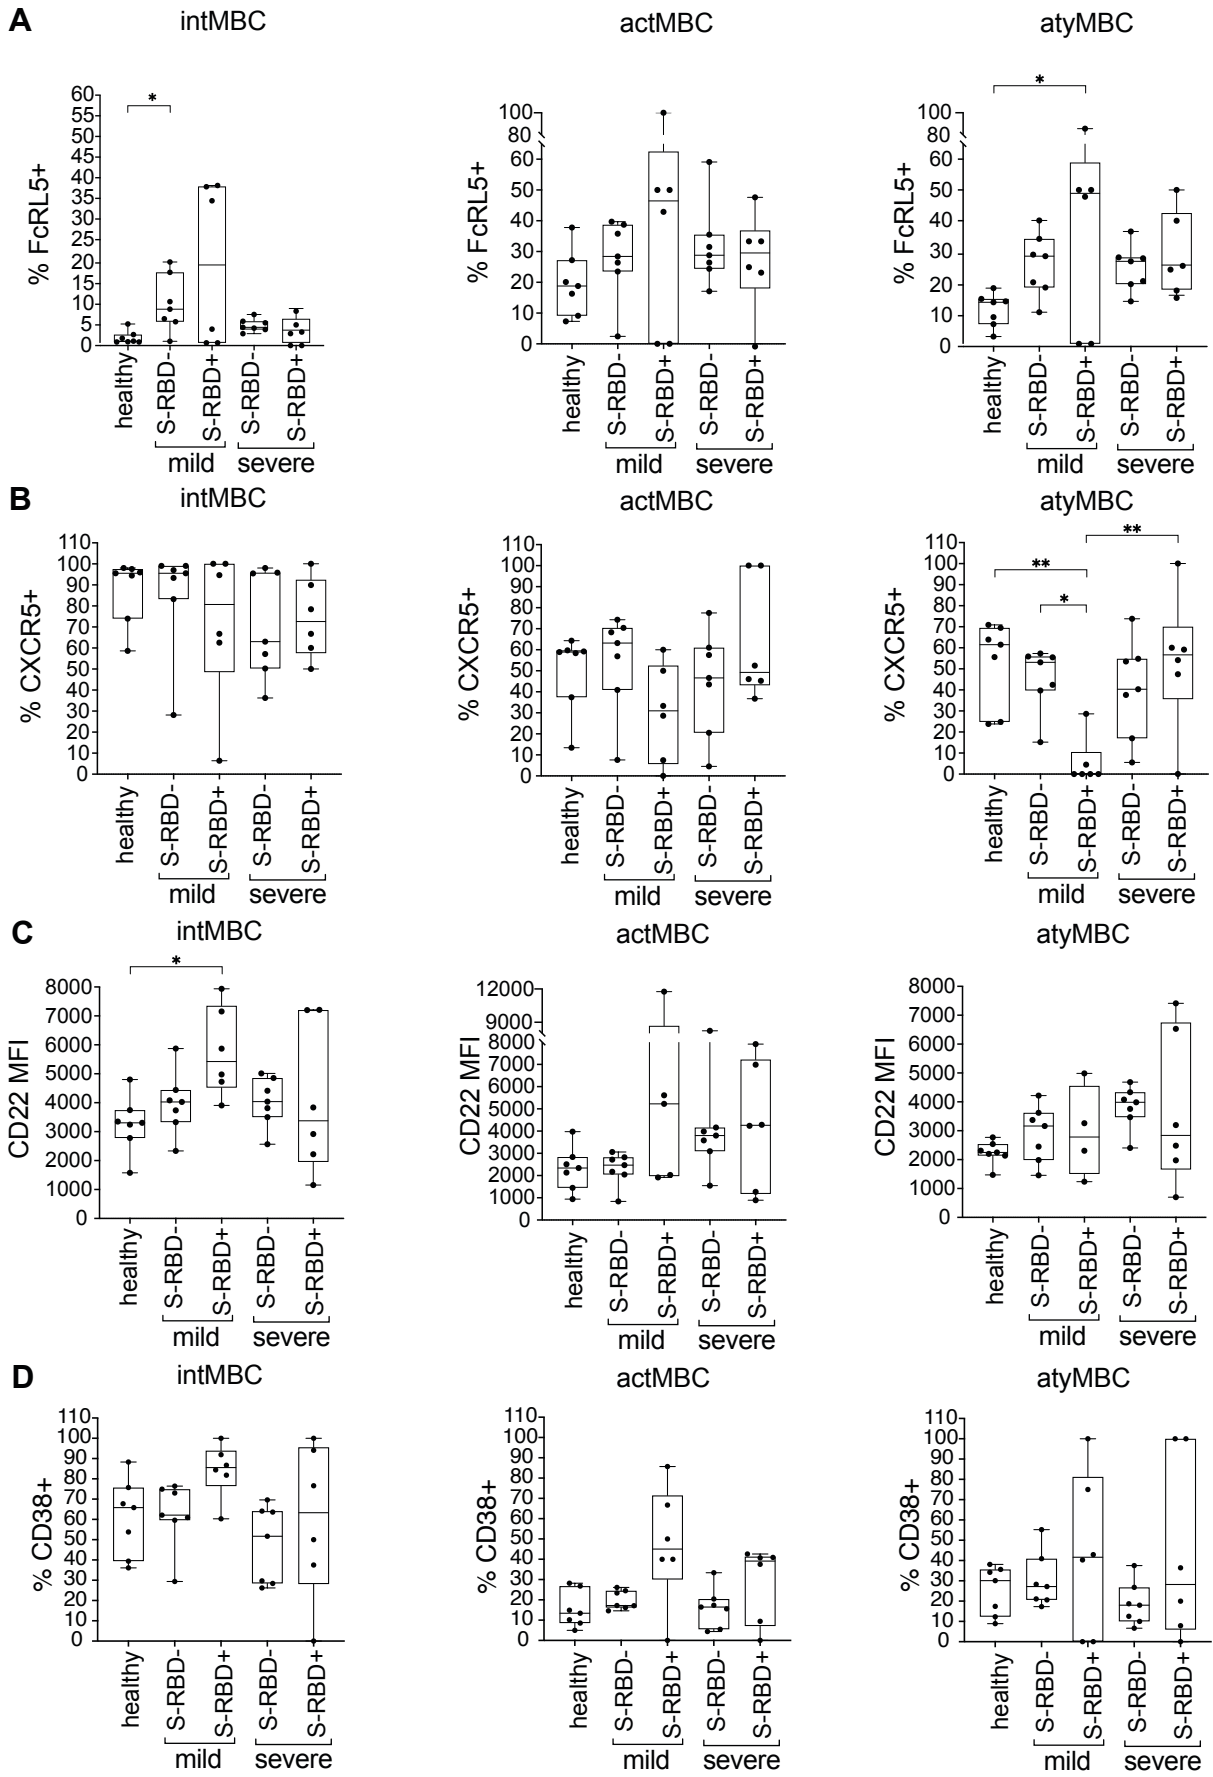

Gi dd`Ya YbHJ': ][ i fY) "Gi fZMW`Yl dfYgg]cb`cZ: WF @ ž7 L7 F) ž7 8 &žUbX'7 8' , `cb`  
G!F6 8 `bcbgdYVjZWFg!F6 8 !Lcf`G!F6 8 `gdYVjZWFg!F6 8 žLWUgg`gk ]HW YX`]bhA 6 7 ž  
UWA6 7 žcf`UmA6 7 `Zca ` YUH nža ]Xžcf`gYj YfYdUf]VdUbrg"9l dfYgg]cb`]g`  
gl`ck b`Ug`Y]H Yf`dYfWbhcZWV`g`dgcg]Hj Ycf`H Ya YUb`Zi cfYgWb]bh]bg]lmifA : ±"  
f5 L&ÜSİ Á6 LÔYÔUÍ Á7 LÔÖGGÁ8 LÔÖH ÈP [ iã [ ] æÁā ^•Á āāææÁ ^æ•Èā [ ç^Áæ^Á  
ā ç!È`æç^Áā \*^Èā āÁ @ \^!•Áæ^Á ā ā ~ { Á Á æā ~ { ÈP [ i{ æā Á Áææā æ Á  
ā ç!{ ā ^áÁ•ā \*ÁÜ@ā a[ Á ā Á [ i{ æā Á •Èā ā & [ ] æā [ ] •Á ^!^Á ^!ç!{ ^áÁ•ā \*Á  
[ ] ^È æ Á P UXOÁ Á [ i{ æ^ Á ā dā ~ ç!á ÁææÁ 5 ž7 ž8 DÁ Á S! ~ \æË æā Á •Á Á [ ] È  
} [ i{ æ^ Á ā dā ~ ç!á ÁææÁ 6 DÁ ā @ Á çæ ^•Ááb • ç!Á Á ~ |ç! ^Á [ ] æā [ ] •Á •ā \* Á @ Á  
Ó } læ ā žS! ā ^!Áæ ā Á ^ \ ç! |á ^ ç @ ā È Uæā çæ | Á ā } āāæ ç! [ ] æā [ ] •Áæ^Á  
ā āāæ ā ÁÉÁÁÁÉÉ ÈÉÁÁÁÉÉÉ

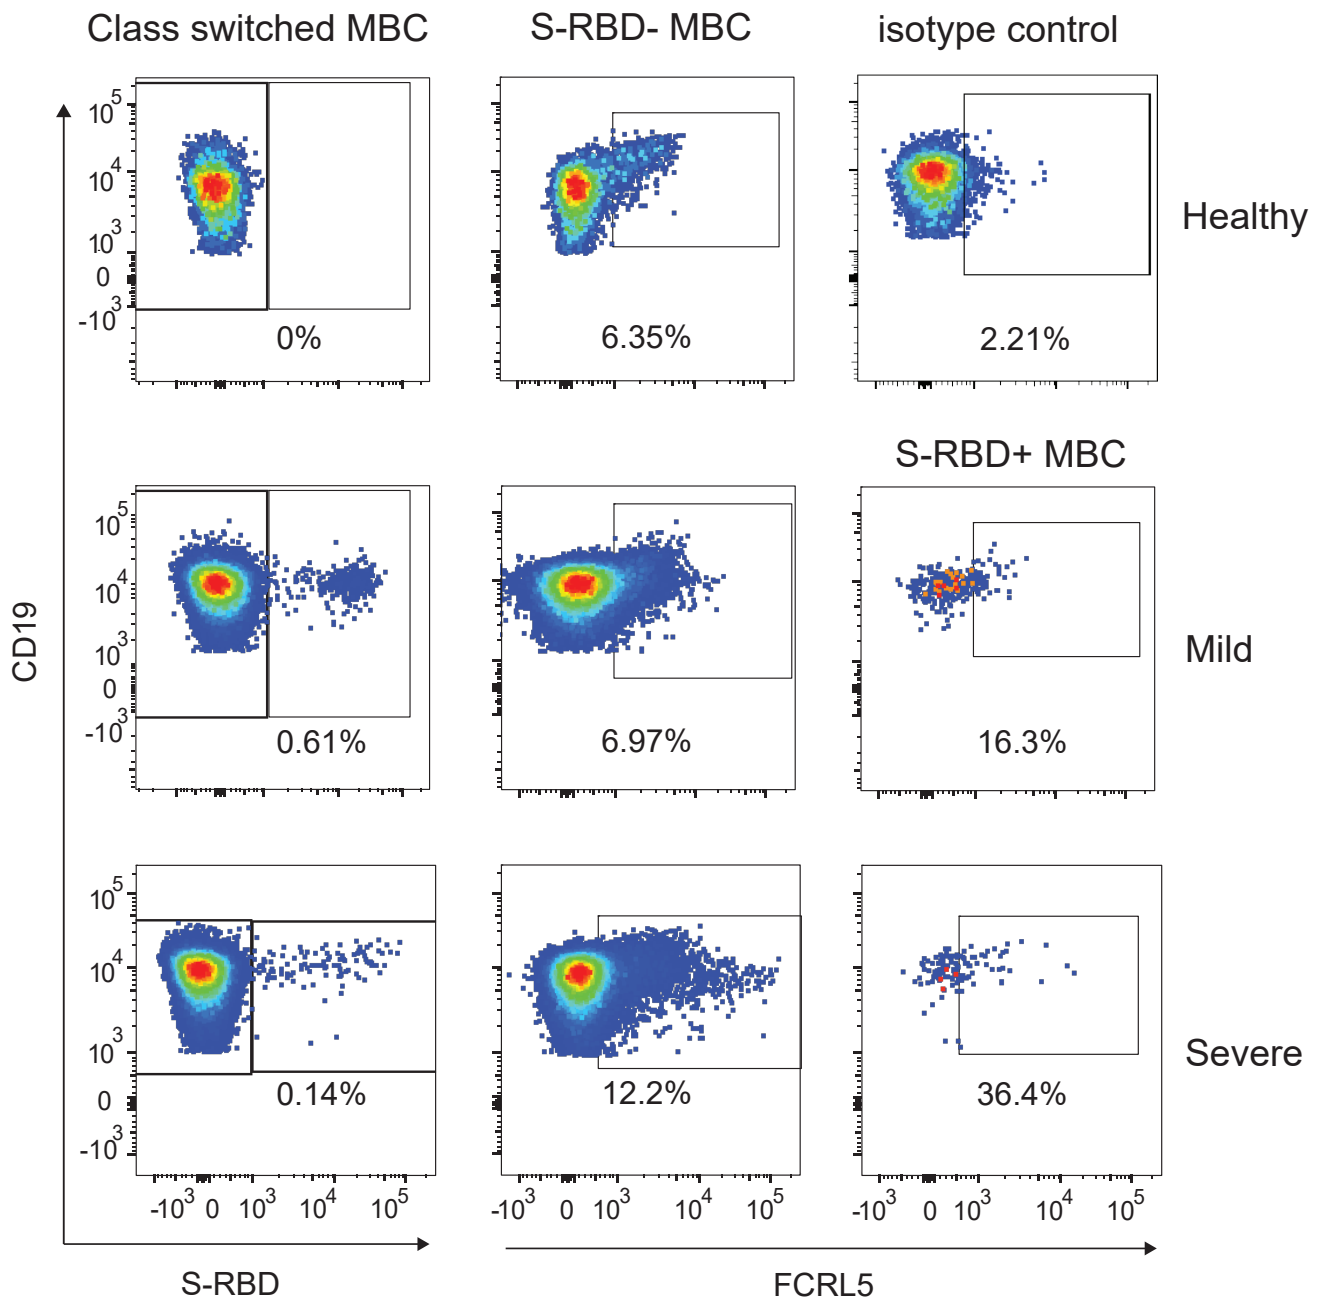

**Supplemental Figure 6. Representative gating of FCRL5+ class switched MBC.** The first column shows the gating strategy for S-RBD specific class switched MBC (CD3-, CD19+, IgM-, IgD-, CD38+/- (excluding ++), CD138-, S-RBD+). The top right panel shows a representative FCRL5 isotype control that was used in conjunction with a fluorescence minus one (FMO) sample to set the gate for FCRL5. The remaining panels represent FCRL5 staining as seen in S-RBD+ or S-RBD- cells from “healthy” (COVID-19 negative), “mild” (COVID-19+, ambulatory), and “severe” (COVID-19+, hospitalized) participants.
